# Supplementary material
Source: publisher site journal article supplement (https://www.dovepress.com/article/602135)
Supplement: Supplementary file 1 [file 602135%20Supplementary%20Material.docx]

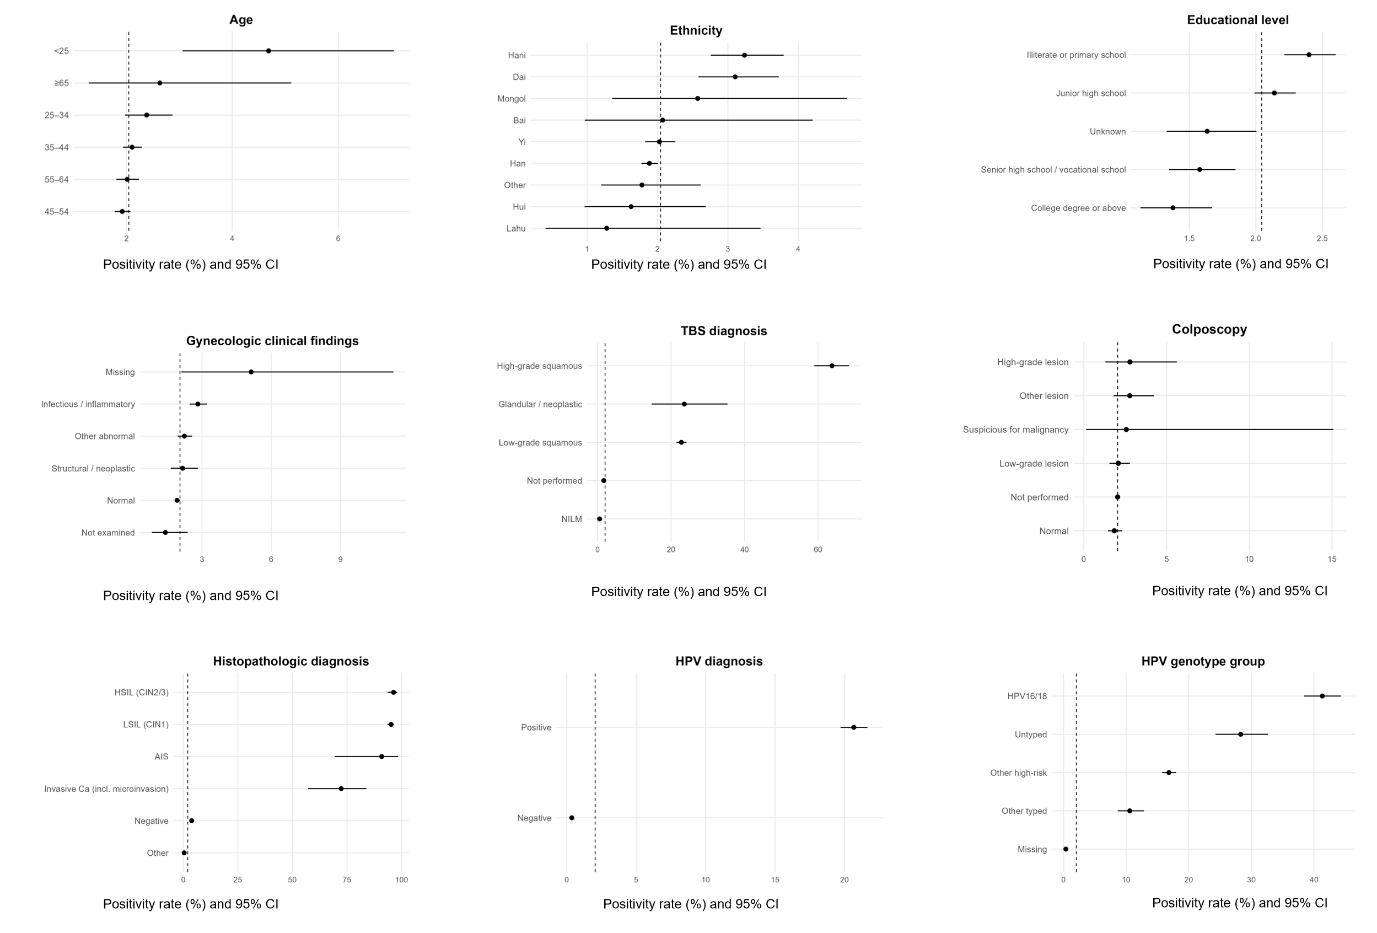


**Supplementary Figure S1**. Forest plots of crude odds ratios for factors associated with a positive final diagnosis

**Note**. Crude odds ratios (ORs) and 95% confidence intervals (95% CIs) were estimated in univariable analyses and are provided as supplementary results.
